# Supplementary material
Source: PubMed Central journal article supplement (PMC7451223)
Supplement: NIHMS1611371-supplement-Lifestyle_Patterns_Supplementary_Material.pdf [file NIHMS1611371-supplement-Lifestyle_Patterns_Supplementary_Material.pdf]

**eTable 1.** Bivariate associations between five behavior/dietary exposures – CBCS Phases I and II, ( $n=1,808$ ).

|                            | Smoking Status   |         |                          | Vegetable Intake<br>(cups/week) |     |                          | Fruit Intake<br>(cups/week) |       |                          | Alcohol Consumption<br>(drinks/week) |     |     |                          |
|----------------------------|------------------|---------|--------------------------|---------------------------------|-----|--------------------------|-----------------------------|-------|--------------------------|--------------------------------------|-----|-----|--------------------------|
|                            | Never/<br>Former | Current | OR <sup>a</sup> (95% CI) | ≥14                             | <14 | OR <sup>a</sup> (95% CI) | ≥10.5                       | <10.5 | OR <sup>a</sup> (95% CI) | None                                 | <7  | ≥7  | OR <sup>b</sup> (95% CI) |
| <b>Vegetable Intake</b>    |                  |         |                          |                                 |     |                          |                             |       |                          |                                      |     |     |                          |
| ≥14 cups/week              | 719              | 190     | 1.00                     |                                 |     |                          |                             |       |                          |                                      |     |     |                          |
| <14 cups/week              | 684              | 207     | 1.15 (0.92-1.43)         |                                 |     |                          |                             |       |                          |                                      |     |     |                          |
| <b>Fruit Intake</b>        |                  |         |                          |                                 |     |                          |                             |       |                          |                                      |     |     |                          |
| ≥10.5 cups/week            | 685              | 146     | 1.00                     | 598                             | 233 | 1.00                     |                             |       |                          |                                      |     |     |                          |
| <10.5 cups/week            | 716              | 252     | 1.65 (1.31-2.08)         | 308                             | 658 | 5.48 (4.48-6.72)         |                             |       |                          |                                      |     |     |                          |
| <b>Alcohol Consumption</b> |                  |         |                          |                                 |     |                          |                             |       |                          |                                      |     |     |                          |
| None                       | 700              | 103     | 1.00                     | 371                             | 428 | 1.00                     | 367                         | 431   | 1.00                     |                                      |     |     |                          |
| 1-6 drinks/week            | 561              | 196     | 2.37 (1.83-3.09)         | 407                             | 349 | 0.74 (0.61-0.91)         | 340                         | 414   | 1.04 (0.85-1.27)         |                                      |     |     |                          |
| ≥7 drinks/week             | 141              | 97      | 4.68 (3.36-6.51)         | 128                             | 108 | 0.73 (0.54-0.98)         | 121                         | 117   | 0.82 (0.62-1.10)         |                                      |     |     |                          |
| <b>Physical Activity</b>   |                  |         |                          |                                 |     |                          |                             |       |                          |                                      |     |     |                          |
| 5-7 times/week             | 338              | 74      | 1.00                     | 226                             | 185 | 1.00                     | 214                         | 196   | 1.00                     | 164                                  | 185 | 59  | 1.00                     |
| 1-4 times/week             | 413              | 84      | 0.93 (0.66-1.31)         | 267                             | 228 | 1.04 (0.80-1.36)         | 249                         | 247   | 1.08 (0.83-1.41)         | 209                                  | 215 | 72  | 1.06 (0.83-1.36)         |
| <1 time/week               | 654              | 237     | 1.66 (1.24-2.22)         | 411                             | 475 | 1.41 (1.12-1.79)         | 362                         | 523   | 1.58 (1.25-2.00)         | 424                                  | 356 | 106 | 1.33 (1.07-1.67)         |

<sup>a</sup>Odds ratios (ORs) and 95% confidence intervals (CIs) from bivariate logistic regression models.

<sup>b</sup>ORs and 95% CI from bivariate ordinal logistic regression model. Score test for the proportional odds assumption:  $\chi^2=0.30$ ,  $df=2$ ,  $P=0.86$

**eTable 2.** Results from the latent class analysis of five behavior/dietary exposures – CBCS Phases I and II, ( $n=1,808$ ).

| # of LCs | Log Likelihood   | Best $H_0$ Replicated | # of Parameters | AIC              | BIC              | SSABIC           | LMR LRT P        | Entropy      |
|----------|------------------|-----------------------|-----------------|------------------|------------------|------------------|------------------|--------------|
| 1        | -7099.352        | Yes                   | 7               | 14212.705        | 14251.205        | 14228.966        | N.A.             | N.A.         |
| 2        | -6930.318        | Yes                   | 15              | 13890.635        | 13973.135        | 13925.481        | <0.001           | 0.605        |
| <b>3</b> | <b>-6879.435</b> | <b>Yes</b>            | <b>23</b>       | <b>13804.871</b> | <b>13931.370</b> | <b>13858.300</b> | <b>&lt;0.001</b> | <b>0.834</b> |
| 4        | -6863.992        | Yes                   | 31              | 13789.985        | 13960.484        | 13861.999        | 0.022            | 0.750        |

AIC=Akaike Information Criterion; BIC=Bayesian Information Criterion; LC=Latent Class; LMR LRT= Lo-Mendell-Rubin Adjusted Likelihood Ratio Test; SSAIBC=Sample-size adjusted BIC

**eTable 3.** Hazard Ratios (HRs) and 95% confidence intervals (CIs) for behavior/dietary exposures and 5-year mortality following breast cancer – CBCS Phases I and II (*n*=1,808).

|                                                                      | Deaths    | Censored | 5-Year All-Cause Mortality ( <i>n</i> deaths=309) |                      |                      |
|----------------------------------------------------------------------|-----------|----------|---------------------------------------------------|----------------------|----------------------|
|                                                                      |           |          | Model 1 <sup>a</sup>                              | Model 2 <sup>b</sup> | Model 3 <sup>c</sup> |
|                                                                      |           |          | HR (95% CI)                                       | HR (95% CI)          | HR (95% CI)          |
| <b>Smoking status</b>                                                |           |          |                                                   |                      |                      |
| Never/Former                                                         | 232       | 1,178    | 1.00                                              | 1.00                 | 1.00                 |
| Current                                                              | 77        | 321      | 1.22 (0.94-1.58)                                  | 1.14 (0.88-1.48)     | 1.15 (0.87-1.52)     |
| <b>Vegetable Intake</b>                                              |           |          |                                                   |                      |                      |
| ≥14 cups/week                                                        | 143       | 766      | 1.00                                              | 1.00                 | 1.00                 |
| <14 cups/week                                                        | 164       | 727      | 1.17 (0.93-1.46)                                  | 1.10 (0.88-1.38)     | 1.11 (0.87-1.41)     |
| <b>Fruit Intake</b>                                                  |           |          |                                                   |                      |                      |
| ≥10.5 cups/week                                                      | 139       | 692      | 1.00                                              | 1.00                 | 1.00                 |
| <10.5 cups/week                                                      | 168       | 800      | 1.08 (0.86-1.35)                                  | 1.04 (0.83-1.30)     | 1.02 (0.80-1.31)     |
| <b>Alcohol Consumption</b>                                           |           |          |                                                   |                      |                      |
| None                                                                 | 167       | 636      | 1.00                                              | 1.00                 | 1.00                 |
| 1-6 drinks/week                                                      | 108       | 649      | 0.78 (0.61-1.00)                                  | 0.84 (0.65-1.08)     | 0.91 (0.70-1.20)     |
| ≥7 drinks/week                                                       | 32        | 206      | 0.70 (0.48-1.02)                                  | 0.71 (0.48-1.03)     | 0.81 (0.54-1.22)     |
| <b>Physical Activity</b>                                             |           |          |                                                   |                      |                      |
| 5-7 times/week                                                       | 66        | 346      | 1.00                                              | 1.00                 | 1.00                 |
| 1-4 times/week                                                       | 76        | 421      | 0.96 (0.69-1.34)                                  | 1.00 (0.72-1.39)     | 1.10 (0.77-1.56)     |
| <1 time/week                                                         | 167       | 724      | 1.15 (0.87-1.54)                                  | 1.09 (0.82-1.46)     | 1.03 (0.75-1.40)     |
| <b>Latent Classes</b>                                                |           |          |                                                   |                      |                      |
| HBD                                                                  | 149       | 767      | 1.00                                              | 1.00                 | 1.00                 |
| HB-UD                                                                | 113       | 511      | 1.14 (0.89-1.45)                                  | 1.06 (0.83-1.36)     | 1.09 (0.84-1.43)     |
| UBD                                                                  | 47        | 221      | 1.11 (0.80-1.54)                                  | 1.03 (0.74-1.43)     | 1.11 (0.78-1.58)     |
| HB-UD/UD                                                             | 160       | 732      | 1.13 (0.90-1.41)                                  | 1.05 (0.84-1.32)     | 1.10 (0.86-1.40)     |
| <b>5-Year Breast Cancer-Specific Mortality (<i>n</i> deaths=248)</b> |           |          |                                                   |                      |                      |
|                                                                      | BC Deaths | Censored | Model 1 <sup>a</sup>                              | Model 2 <sup>b</sup> | Model 3 <sup>c</sup> |
|                                                                      |           |          | csHR (95% CI)                                     | csHR (95% CI)        | csHR (95% CI)        |
| <b>Smoking status</b>                                                |           |          |                                                   |                      |                      |
| Never/former                                                         | 189       | 1,221    | 1.00                                              | 1.00                 | 1.00                 |
| Current                                                              | 59        | 339      | 1.04 (0.77-1.39)                                  | 1.00 (0.74-1.34)     | 1.03 (0.75-1.42)     |
| <b>Vegetable Intake</b>                                              |           |          |                                                   |                      |                      |
| ≥14 cups/week                                                        | 116       | 793      | 1.00                                              | 1.00                 | 1.00                 |
| <14 cups/week                                                        | 132       | 759      | 1.09 (0.85-1.40)                                  | 1.05 (0.82-1.35)     | 1.01 (0.77-1.33)     |
| <b>Fruit Intake</b>                                                  |           |          |                                                   |                      |                      |
| ≥10.5 cups/week                                                      | 109       | 722      | 1.00                                              | 1.00                 | 1.00                 |
| <10.5 cups/week                                                      | 139       | 829      | 1.06 (0.82-1.36)                                  | 1.03 (0.80-1.32)     | 1.00 (0.76-1.32)     |
| <b>Alcohol Consumption</b>                                           |           |          |                                                   |                      |                      |
| None                                                                 | 134       | 669      | 1.00                                              | 1.00                 | 1.00                 |
| 1-6 drinks/week                                                      | 85        | 672      | 0.61 (0.46-0.81)                                  | 0.63 (0.47-0.84)     | 0.71 (0.52-0.97)     |
| ≥7 drinks/week                                                       | 27        | 211      | 0.61 (0.40-0.93)                                  | 0.61 (0.40-0.93)     | 0.77 (0.49-1.19)     |
| <b>Physical Activity</b>                                             |           |          |                                                   |                      |                      |
| 5-7 times/week                                                       | 48        | 364      | 1.00                                              | 1.00                 | 1.00                 |
| 1-4 times/week                                                       | 63        | 434      | 1.03 (0.71-1.50)                                  | 1.05 (0.72-1.53)     | 1.13 (0.76-1.68)     |
| <1 time/week                                                         | 137       | 754      | 1.19 (0.86-1.66)                                  | 1.15 (0.83-1.61)     | 1.03 (0.72-1.46)     |
| <b>Latent Classes</b>                                                |           |          |                                                   |                      |                      |
| HBD                                                                  | 123       | 793      | 1.00                                              | 1.00                 | 1.00                 |
| HB-UD                                                                | 91        | 533      | 1.01 (0.77-1.33)                                  | 0.96 (0.73-1.27)     | 0.96 (0.71-1.29)     |
| UBD                                                                  | 34        | 234      | 0.84 (0.57-1.23)                                  | 0.80 (0.54-1.17)     | 0.89 (0.59-1.34)     |
| HB-UD/UD                                                             | 125       | 767      | 0.96 (0.74-1.23)                                  | 0.91 (0.71-1.18)     | 0.94 (0.71-1.23)     |

Carolina Breast Cancer Study (CBCS) participants were diagnosed with invasive breast cancer from 1993-1996 (Phase I) and 1996-2000 (Phase II) and followed-up for vital status through December 31, 2011.

HBD=Healthy Behavior and Diet; HB-UD=Healthy Behavior and Unhealthy Diet; UBD=Unhealthy Behavior and Diet

<sup>a</sup>Adjusted for age at diagnosis (≥50 vs. <50 years), race (black vs. white), and study phase (Phase I vs. Phase II).

<sup>b</sup>Adjusted for variables in Model 1 and education (<High school, High school/GED, and ≥College), and marital status (unmarried vs. married).

<sup>c</sup>Adjusted for variables in Model 2 and tumor size (>2.0 vs. ≤2.0 cm) and estrogen receptor status (ER<sup>+</sup> vs. ER<sup>-</sup>).

**eTable 4.** Association between behavior/dietary exposures and 13-year conditional all-cause mortality following breast cancer, stratified by race and age at diagnosis – CBCS Phases I and II ( $n=1,499$ ).

|                         | 13-Year Conditional All-Cause Mortality |                           |                          | $P_{\text{Interaction}}$ |
|-------------------------|-----------------------------------------|---------------------------|--------------------------|--------------------------|
|                         | Deaths<br>( $n=408$ )                   | Censored<br>( $n=1,091$ ) | HR (95% CI) <sup>a</sup> |                          |
| <b>Race</b>             |                                         |                           |                          | 0.98                     |
| <b>White</b>            |                                         |                           |                          |                          |
| HBD                     | 101                                     | 373                       | 1.00                     |                          |
| HB-UD/UBD               | 103                                     | 301                       | 1.18 (0.88-1.59)         |                          |
| <b>Black</b>            |                                         |                           |                          |                          |
| HBD                     | 89                                      | 204                       | 1.00                     |                          |
| HB-UD/UBD               | 115                                     | 213                       | 1.22 (0.90-1.64)         |                          |
| <b>Age at diagnosis</b> |                                         |                           |                          | 0.45                     |
| <b>&lt;50 years</b>     |                                         |                           |                          |                          |
| HBD                     | 60                                      | 301                       | 1.00                     |                          |
| HB-UD/UBD               | 91                                      | 343                       | 1.07 (0.76-1.52)         |                          |
| <b>≥50 years</b>        |                                         |                           |                          |                          |
| HBD                     | 130                                     | 276                       | 1.00                     |                          |
| HB-UD/UBD               | 127                                     | 171                       | 1.38 (1.06-1.79)         |                          |

Carolina Breast Cancer Study (CBCS) participants were diagnosed with invasive breast cancer from 1993-1996 (Phase I) and 1996-2000 (Phase II) and followed-up for vital status through December 31, 2011. Conditional analyses are among women who survived >5 years.

ER=Estrogen Receptor; HBD=Healthy Behavior and Diet; HB-UD=Healthy Behavior and Unhealthy Diet; UBD=Unhealthy Behavior and Diet

<sup>a</sup>Adjusted for age at diagnosis (≥50 vs. <50 years), race (black vs. white), study phase (Phase I vs. Phase II), education (<High school, High school/GED, and ≥College), marital status (unmarried vs. married), tumor size (>2.0 vs. ≤2.0 cm), and ER status (ER<sup>+</sup> vs. ER<sup>-</sup>), as appropriate.

**eTable 5.** Hazard Ratios (HRs) and 95% confidence intervals (CIs) from hazard and subdistribution hazard models for behavior/dietary exposures and 13-year conditional breast cancer-specific mortality – CBCS Phases I and II (*n*=1,499).

|                            | BC<br>Deaths<br>( <i>n</i> =179) | Non-BC<br>Deaths<br>( <i>n</i> =229) | Censored<br>( <i>n</i> =1,091) | 13-Year Conditional Hazard Model for<br>Breast Cancer Mortality |                      |                      | 13-Year Conditional Subdistribution Hazard Model<br>for Breast Cancer Mortality |                      |                      |
|----------------------------|----------------------------------|--------------------------------------|--------------------------------|-----------------------------------------------------------------|----------------------|----------------------|---------------------------------------------------------------------------------|----------------------|----------------------|
|                            |                                  |                                      |                                | Model 1 <sup>a</sup>                                            | Model 2 <sup>b</sup> | Model 3 <sup>c</sup> | Model 1 <sup>a</sup>                                                            | Model 2 <sup>b</sup> | Model 3 <sup>c</sup> |
|                            |                                  |                                      |                                | csHR (95% CI)                                                   | csHR (95% CI)        | csHR (95% CI)        | sHR (95% CI)                                                                    | sHR (95% CI)         | sHR (95% CI)         |
| <b>Smoking status</b>      |                                  |                                      |                                |                                                                 |                      |                      |                                                                                 |                      |                      |
| Never/former               | 127                              | 169                                  | 882                            | 1.00                                                            | 1.00                 | 1.00                 | 1.00                                                                            | 1.00                 | 1.00                 |
| Current                    | 52                               | 60                                   | 209                            | 1.46 (1.05-2.01)                                                | 1.41 (1.02-1.95)     | 1.44 (1.02-2.02)     | 1.42 (1.03-1.96)                                                                | 1.38 (1.00-1.92)     | 1.43 (1.01-2.01)     |
| <b>Vegetable Intake</b>    |                                  |                                      |                                |                                                                 |                      |                      |                                                                                 |                      |                      |
| ≥14 cups/week              | 85                               | 108                                  | 573                            | 1.00                                                            | 1.00                 | 1.00                 | 1.00                                                                            | 1.00                 | 1.00                 |
| <14 cups/week              | 93                               | 119                                  | 515                            | 1.13 (0.84-1.51)                                                | 1.09 (0.81-1.46)     | 0.99 (0.73-1.34)     | 1.09 (0.81-1.46)                                                                | 1.05 (0.78-1.42)     | 0.95 (0.70-1.30)     |
| <b>Fruit Intake</b>        |                                  |                                      |                                |                                                                 |                      |                      |                                                                                 |                      |                      |
| ≥10.5 cups/week            | 81                               | 101                                  | 510                            | 1.00                                                            | 1.00                 | 1.00                 | 1.00                                                                            | 1.00                 | 1.00                 |
| <10.5 cups/week            | 97                               | 124                                  | 579                            | 1.01 (0.75-1.36)                                                | 0.98 (0.73-1.32)     | 1.02 (0.75-1.38)     | 1.00 (0.74-1.35)                                                                | 0.98 (0.73-1.32)     | 1.01 (0.74-1.38)     |
| <b>Alcohol Consumption</b> |                                  |                                      |                                |                                                                 |                      |                      |                                                                                 |                      |                      |
| None                       | 80                               | 125                                  | 431                            | 1.00                                                            | 1.00                 | 1.00                 | 1.00                                                                            | 1.00                 | 1.00                 |
| 1-6 drinks/week            | 74                               | 68                                   | 507                            | 0.80 (0.58-1.11)                                                | 0.83 (0.59-1.15)     | 0.83 (0.59-1.17)     | 0.83 (0.60-1.15)                                                                | 0.86 (0.62-1.20)     | 0.85 (0.60-1.21)     |
| ≥7 drinks/week             | 21                               | 34                                   | 151                            | 0.75 (0.46-1.22)                                                | 0.76 (0.47-1.24)     | 0.79 (0.48-1.32)     | 0.77 (0.47-1.26)                                                                | 0.78 (0.48-1.28)     | 0.84 (0.50-1.41)     |
| <b>Physical Activity</b>   |                                  |                                      |                                |                                                                 |                      |                      |                                                                                 |                      |                      |
| 5-7 times/week             | 40                               | 56                                   | 250                            | 1.00                                                            | 1.00                 | 1.00                 | 1.00                                                                            | 1.00                 | 1.00                 |
| 1-4 times/week             | 39                               | 51                                   | 331                            | 0.72 (0.46-1.12)                                                | 0.74 (0.47-1.14)     | 0.80 (0.51-1.27)     | 0.74 (0.48-1.15)                                                                | 0.75 (0.48-1.17)     | 0.81 (0.51-1.29)     |
| <1 time/week               | 98                               | 121                                  | 505                            | 1.09 (0.76-1.58)                                                | 1.06 (0.73-1.54)     | 1.05 (0.71-1.54)     | 1.08 (0.74-1.56)                                                                | 1.05 (0.72-1.52)     | 1.03 (0.70-1.52)     |
| <b>Latent Classes</b>      |                                  |                                      |                                |                                                                 |                      |                      |                                                                                 |                      |                      |
| HBD                        | 81                               | 109                                  | 577                            | 1.00                                                            | 1.00                 | 1.00                 | 1.00                                                                            | 1.00                 | 1.00                 |
| HB-UD                      | 66                               | 76                                   | 369                            | 1.17 (0.85-1.62)                                                | 1.12 (0.80-1.55)     | 1.06 (0.76-1.49)     | 1.14 (0.82-1.58)                                                                | 1.09 (0.79-1.52)     | 1.04 (0.74-1.48)     |
| UBD                        | 32                               | 44                                   | 145                            | 1.26 (0.83-1.89)                                                | 1.20 (0.79-1.81)     | 1.22 (0.79-1.87)     | 1.21 (0.80-1.83)                                                                | 1.17 (0.77-1.77)     | 1.20 (0.77-1.85)     |
| HB-UD/UD                   | 98                               | 120                                  | 514                            | 1.20 (0.89-1.61)                                                | 1.14 (0.85-1.54)     | 1.11 (0.81-1.51)     | 1.16 (0.86-1.56)                                                                | 1.12 (0.83-1.51)     | 1.09 (0.79-1.49)     |

Carolina Breast Cancer Study (CBCS) participants were diagnosed with invasive breast cancer from 1993-1996 (Phase I) and 1996-2000 (Phase II) and followed-up for vital status through December 31, 2011. Conditional analyses are among women who survived >5 years.

BC=breast cancer; HBD=Healthy Behavior and Diet; HB-UD=Healthy Behavior and Unhealthy Diet; UBD=Unhealthy Behavior and Diet

<sup>a</sup>Adjusted for age at diagnosis (≥50 vs <50 years), race (black vs. white), study phase (Phase I vs. Phase II).

<sup>b</sup>Adjusted for variables in Model 1 and education (<High school, High school/GED, and ≥College), and marital status (unmarried vs. married).

<sup>c</sup>Adjusted for variables in Model 2 and tumor size (>2.0 vs. ≤2.0 cm), and estrogen receptor status (ER<sup>+</sup> vs. ER<sup>-</sup>).

**eTable 6.** Hazard Ratios (HRs) and 95% confidence intervals (CIs) from hazard and subdistribution hazard models for behavior/dietary exposures and 13-year conditional breast cancer-specific mortality, stratified by race, age at diagnosis, and estrogen receptor status – CBCS Phases I and II ( $n=1,499$ ).

|                         | BC<br>Deaths<br>( $n=179$ ) | Non-BC<br>Deaths<br>( $n=229$ ) | Censored<br>( $n=1,091$ ) | 13-Year Conditional<br>Hazard Model for<br>BC Mortality |                          | 13-Year Conditional<br>Subdistribution Hazard<br>Model for BC Mortality |                          |
|-------------------------|-----------------------------|---------------------------------|---------------------------|---------------------------------------------------------|--------------------------|-------------------------------------------------------------------------|--------------------------|
|                         |                             |                                 |                           | csHR (95% CI) <sup>a</sup>                              | $P_{\text{Interaction}}$ | sHR (95% CI) <sup>a</sup>                                               | $P_{\text{Interaction}}$ |
| <u>Race</u>             |                             |                                 |                           |                                                         | 0.49                     |                                                                         | 0.47                     |
| <b>White</b>            |                             |                                 |                           |                                                         |                          |                                                                         |                          |
| HBD                     | 40                          | 61                              | 373                       | 1.00                                                    |                          | 1.00                                                                    |                          |
| HB-UD/UBD               | 48                          | 55                              | 301                       | 1.17 (0.75-1.84)                                        |                          | 1.19 (0.76-1.88)                                                        |                          |
| <b>Black</b>            |                             |                                 |                           |                                                         |                          |                                                                         |                          |
| HBD                     | 41                          | 48                              | 204                       | 1.00                                                    |                          | 1.00                                                                    |                          |
| HB-UD/UBD               | 50                          | 65                              | 213                       | 1.02 (0.67-1.57)                                        |                          | 0.98 (0.63-1.52)                                                        |                          |
| <u>Age at diagnosis</u> |                             |                                 |                           |                                                         | 0.37                     |                                                                         | 0.39                     |
| <b>&lt;50 years</b>     |                             |                                 |                           |                                                         |                          |                                                                         |                          |
| HBD                     | 47                          | 13                              | 301                       | 1.00                                                    |                          | 1.00                                                                    |                          |
| HB-UD/UBD               | 62                          | 29                              | 343                       | 1.00 (0.67-1.49)                                        |                          | 1.01 (0.67-1.52)                                                        |                          |
| <b>≥50 years</b>        |                             |                                 |                           |                                                         |                          |                                                                         |                          |
| HBD                     | 34                          | 96                              | 276                       | 1.00                                                    |                          | 1.00                                                                    |                          |
| HB-UD/UBD               | 36                          | 91                              | 171                       | 1.35 (0.83-2.20)                                        |                          | 1.24 (0.76-2.03)                                                        |                          |
| <u>ER Status</u>        |                             |                                 |                           |                                                         | 0.20                     |                                                                         | 0.19                     |
| <b>ER<sup>-</sup></b>   |                             |                                 |                           |                                                         |                          |                                                                         |                          |
| HBD                     | 20                          | 32                              | 228                       | 1.00                                                    |                          | 1.00                                                                    |                          |
| HB-UD/UBD               | 35                          | 36                              | 203                       | 1.52 (0.86-2.67)                                        |                          | 1.49 (0.84-2.63)                                                        |                          |
| <b>ER<sup>+</sup></b>   |                             |                                 |                           |                                                         |                          |                                                                         |                          |
| HBD                     | 59                          | 67                              | 317                       | 1.00                                                    |                          | 1.00                                                                    |                          |
| HB-UD/UBD               | 59                          | 74                              | 271                       | 1.01 (0.69-1.47)                                        |                          | 0.98 (0.66-1.43)                                                        |                          |

Carolina Breast Cancer Study (CBCS) participants were diagnosed with invasive breast cancer from 1993-1996 (Phase I) and 1996-2000 (Phase II) and followed-up for vital status through December 31, 2011. Conditional analyses are among women who survived >5 years.

BC=breast cancer; ER=estrogen receptor; HBD=Healthy Behavior and Diet; HB-UD=Healthy Behavior and Unhealthy Diet; UBD=Unhealthy Behavior and Diet

<sup>a</sup>Adjusted for age at diagnosis (≥50 vs. <50 years), race (black vs. white), study phase (Phase I vs. Phase II), education (<High school, High school/GED, and ≥College), marital status (unmarried vs. married), tumor size (>2.0 vs. ≤2.0 cm), and ER status (ER<sup>+</sup> vs. ER<sup>-</sup>), as appropriate.
